# Supplementary material
Source: PubMed Central journal article supplement (PMC2651009)
Supplement: blood-2008-04-153858_1.pdf [file blood-2008-04-153858_1.pdf]

| Gene<br>Alias/polymorphism<br>rs number     | Genotype | PCB 180 in Carpet Dust |     |                         |        |            | PCB 180 in Plasma |    |                           |        |            | TEQ in Plasma |    |                          |        |            |
|---------------------------------------------|----------|------------------------|-----|-------------------------|--------|------------|-------------------|----|---------------------------|--------|------------|---------------|----|--------------------------|--------|------------|
|                                             |          | Ca                     | Co  | NHL Risk (a)            | P      | P<br>inter | Ca                | Co | NHL Risk (b)              | P      | P<br>inter | Ca            | Co | NHL Risk (c)             | P      | P<br>inter |
| <i>CCR2</i> (d)<br>V64I<br>rs1799864        | GG       | 478                    | 370 | 1.0%<br>(0.2%-1.8%)     | 0.016  |            | 75                | 77 | 9.5%<br>(2.3% - 17.2%)    | 0.0088 |            | 73            | 72 | 8.2%<br>(0.6% - 16.4%)   | 0.035  |            |
|                                             | AG AA    | 106                    | 77  | -0.1%                   | 0.90   | 0.38       | 16                | 19 | -4.7%<br>(-23.9% - 19.5%) | 0.68   | 0.13       | 15            | 19 | 8.0%<br>(-12.8% - 33.8%) | 0.48   | 0.99       |
| <i>IFNG</i><br>IVS3+284G>A<br>rs1861494     | AA       | 299                    | 230 | 1.0%<br>(-0.04% - 2.0%) | 0.058  |            | 49                | 59 | 14.5%<br>(4.2% - 26.0%)   | 0.0051 |            | 48            | 57 | 13.3%<br>(2.7% - 24.9%)  | 0.013  |            |
|                                             | AG GG    | 280                    | 206 | 0.5%<br>(-0.5% - 1.5%)  | 0.36   | 0.34       | 44                | 37 | 2.1%<br>(-6.7% - 11.7%)   | 0.65   | 0.058      | 42            | 34 | 1.9%<br>(-7.9% - 12.8%)  | 0.71   | 0.33       |
| <i>IFNG</i><br>C-1615T<br>rs2069705         | TT       | 243                    | 188 | 1.2%<br>(0.1% - 2.4%)   | 0.033  |            | 39                | 46 | 16.9%<br>(3.7% - 31.6%)   | 0.010  |            | 39            | 45 | 19.2%<br>(4.8% - 35.7%)  | 0.0077 |            |
|                                             | CT CC    | 333                    | 245 | 0.5%<br>(-0.5% - 1.4%)  | 0.34   | 0.48       | 53                | 50 | 3.8%<br>(-4.0% - 12.2%)   | 0.35   | 0.12       | 50            | 46 | 2.6%<br>(-5.4% - 11.3%)  | 0.53   | 0.30       |
| <i>IFNGR1</i><br>IVS6-4G>A<br>rs3799488     | AA       | 327                    | 257 | 1.3%<br>(0.4% - 2.3%)   | 0.0068 |            | 73                | 79 | 8.0%<br>(0.3% - 16.2%)    | 0.042  |            | 70            | 75 | 6.2%<br>(-1.2% - 14.2%)  | 0.10   |            |
|                                             | AG GG    | 93                     | 72  | -0.5%<br>(-2.5% - 1.5%) | 0.60   | 0.11       | 20                | 17 | 2.4%<br>(-11.9% - 19.1%)  | 0.75   | 0.77       | 20            | 16 | 44.0%<br>(2.3% - >93.0%) | 0.037  | 0.25       |
| <i>IL4</i><br>C-524T<br>rs2243250           | CC       | 386                    | 279 | 0.8%<br>(-0.1% - 1.7%)  | 0.084  |            | 57                | 62 | 11.6%<br>(2.9% - 21.1%)   | 0.0083 |            | 55            | 59 | 13.8%<br>(3.5% - 25.1%)  | 0.0076 |            |
|                                             | CT TT    | 205                    | 167 | 0.6%<br>(-0.6% - 1.8%)  | 0.34   | 0.70       | 33                | 31 | 2.4%<br>(-8.0% - 13.9%)   | 0.67   | 0.13       | 32            | 29 | 0.3%<br>(-11.5% - 13.7%) | 0.96   | 0.035      |
| <i>IL4</i><br>5'UTR,Ex1-168C>T<br>rs2070874 | CC       | 403                    | 294 | 1.0%<br>(0.1% - 1.9%)   | 0.027  |            | 62                | 64 | 9.3%<br>(0.9% - 18.3%)    | 0.030  |            | 60            | 61 | 12.5%<br>(3.0% - 22.9%)  | 0.0089 |            |
|                                             | CT TT    | 192                    | 159 | 0.1%<br>(-1.1% - 1.4%)  | 0.84   | 0.21       | 30                | 29 | 3.0%<br>(-7.9% - 15.1%)   | 0.61   | 0.21       | 29            | 27 | 0.4%<br>(-13.2% - 16.1%) | 0.96   | 0.021      |
| <i>IL8</i><br>T-251A                        | TT       | 172                    | 131 | 1.4%<br>(0.05% - 2.8%)  | 0.043  |            | 27                | 29 | 28.9%<br>(6.4% - 56.1%)   | 0.0095 |            | 27            | 28 | 8.8%<br>(-4.4% - 23.9%)  | 0.20   |            |
|                                             | AT AA    | 401                    | 300 | 0.5%<br>(-0.4% - 1.4%)  | 0.27   | 0.36       | 64                | 67 | 4.8%<br>(-2.2% - 12.3%)   | 0.19   | 0.063      | 61            | 63 | 9.1%<br>(0.4% - 18.6%)   | 0.041  | 0.80       |

| Gene<br>Alias/polymorphisms<br>rs number        | Genotype | PCB 180 in Carpet Dust |     |                        |       |         | PCB 180 in Plasma |    |                           |        |         | TEQ in Plasma |    |                           |        |         |
|-------------------------------------------------|----------|------------------------|-----|------------------------|-------|---------|-------------------|----|---------------------------|--------|---------|---------------|----|---------------------------|--------|---------|
|                                                 |          | Ca                     | Co  | NHL Risk (a)           | P     | P inter | Ca                | Co | NHL Risk (b)              | P      | P inter | Ca            | Co | NHL Risk (c)              | P      | P inter |
| rs4073                                          |          |                        |     |                        |       |         |                   |    |                           |        |         |               |    |                           |        |         |
| <i>IL8</i>                                      | TT       | 182                    | 143 | 1.2%<br>(-0.1% - 2.5%) | 0.074 |         | 30                | 32 | 28.2%<br>(7.0% - 53.5%)   | 0.0069 |         | 30            | 31 | 3.7%<br>(-7.7% - 16.6%)   | 0.54   |         |
| IVS1+230G>T<br>rs2227307                        | GT GG    | 393                    | 291 | 0.5%<br>(-0.4% - 1.4%) | 0.30  | 0.41    | 63                | 62 | 5.2%<br>(-1.9% - 12.9%)   | 0.16   | 0.073   | 60            | 58 | 11.1%<br>(1.7% - 21.5%)   | 0.020  | 0.43    |
| <i>IL10</i>                                     | AA       | 168                    | 144 | 0.5%<br>(-0.8% - 1.8%) | 0.44  |         | 31                | 28 | 6.6%<br>(-5.1% - 19.7%)   | 0.28   |         | 30            | 25 | 15.8%<br>(-1.5% - 36.0%)  | 0.075  |         |
| A-1082G<br>rs1800896                            | AG GG    | 431                    | 309 | 0.9%<br>(0.05% - 1.8%) | 0.038 | 0.37    | 59                | 66 | 9.9%<br>(1.2% - 19.4%)    | 0.025  | 0.14    | 57            | 64 | 5.0%<br>(-3.0% - 13.8%)   | 0.23   | 0.97    |
| <i>IL12A</i>                                    | GG       | 443                    | 335 | 0.5%<br>(-0.3% - 1.4%) | 0.21  |         | 67                | 69 | 10.8%<br>(2.6% - 19.6%)   | 0.0091 |         | 65            | 64 | 14.1%<br>(4.4% - 24.7%)   | 0.0036 |         |
| G8685A<br>rs568408                              | AG AA    | 153                    | 120 | 1.1%<br>(-0.3% - 2.5%) | 0.11  | 0.62    | 26                | 27 | -1.9%<br>(-15.7% - 14.2%) | 0.81   | 0.35    | 25            | 27 | -2.4%<br>(-13.4% - 10.1%) | 0.69   | 0.096   |
| <i>IL13</i>                                     | GG       | 346                    | 285 | 0.7%<br>(-0.2% - 1.7%) | 0.11  |         | 60                | 58 | 7.4%<br>(-0.6% - 16.1%)   | 0.070  |         | 58            | 57 | 2.3%<br>(-5.5% - 10.7%)   | 0.57   |         |
| Q144R<br>rs20541                                | AG AA    | 233                    | 158 | 0.5%<br>(-0.7% - 1.7%) | 0.40  | 0.70    | 33                | 35 | 12.2%<br>(0.1% - 25.8%)   | 0.049  | 0.68    | 32            | 31 | 28.6%<br>(7.9% - 53.2%)   | 0.0050 | 0.085   |
| <i>IL16</i><br>3'UTR,<br>Ex22+871A>G<br>rs859   | AA       | 330                    | 230 | 1.1%<br>(0.1% - 2.1%)  | 0.029 |         | 46                | 48 | 15.0%<br>(3.2% - 28.0%)   | 0.011  |         | 44            | 44 | 11.2%<br>(-0.3% - 24.0%)  | 0.057  |         |
|                                                 | AG GG    | 254                    | 218 | 0.2%<br>(-0.9% - 1.2%) | 0.76  | 0.11    | 45                | 45 | 0.5%<br>(-8.5% - 10.4%)   | 0.91   | 0.0024  | 44            | 44 | 10.3%<br>(-1.3% - 23.4%)  | 0.085  | 0.66    |
| <i>IL16</i><br>3'UTR,<br>Ex22+889G>T<br>rs11325 | GG       | 408                    | 307 | 0.3%<br>(-0.5% - 1.2%) | 0.45  |         | 65                | 53 | 11.2%<br>(1.8% - 21.5%)   | 0.019  |         | 63            | 50 | 17.7%<br>(6.2% - 30.5%)   | 0.0019 |         |
|                                                 | GT TT    | 178                    | 141 | 1.1%<br>(-0.2% - 2.4%) | 0.097 | 0.38    | 25                | 39 | -4.2%<br>(-15.0% - 8.1%)  | 0.49   | 0.77    | 24            | 37 | -3.0%<br>(-14.6% - 10.1%) | 0.64   | 0.42    |
| <i>JAK3</i>                                     | GG       | 222                    | 150 | 0.8%<br>(-0.4% - 2.1%) | 0.19  |         | 54                | 43 | 17.5%<br>(5.1% - 31.4%)   | 0.0045 |         | 52            | 41 | 14.9%<br>(3.3% - 27.8%)   | 0.010  |         |

| Gene<br>Alias/polymorphism<br>rs number | Genotype | PCB 180 in Carpet Dust |     |                        |       |            | PCB 180 in Plasma |    |                         |        |            | TEQ in Plasma |    |                           |        |            |
|-----------------------------------------|----------|------------------------|-----|------------------------|-------|------------|-------------------|----|-------------------------|--------|------------|---------------|----|---------------------------|--------|------------|
|                                         |          | Ca                     | Co  | NHL Risk (a)           | P     | P<br>inter | Ca                | Co | NHL Risk (b)            | P      | P<br>inter | Ca            | Co | NHL Risk (c)              | P      | P<br>inter |
| IVS2+42G>A<br>rs3212713                 | AG AA    | 168                    | 154 | 0.7%<br>(-0.6% - 1.9%) | 0.30  | 0.93       | 35                | 45 | 0.5%<br>(-8.7% - 10.6%) | 0.91   | 0.14       | 35            | 42 | -0.3%<br>(-10.2% - 10.8%) | 0.960  | 0.27       |
| <i>JAK3</i>                             | GG       | 222                    | 150 | 0.9%<br>(-0.3% - 2.2%) | 0.15  |            | 53                | 42 | 17.2%<br>(4.9% - 31.0%) | 0.0051 |            | 51            | 40 | 14.5%<br>(2.9% - 27.4%)   | 0.013  |            |
| IVS2+40G>A<br>rs3212712                 | AG AA    | 174                    | 159 | 0.5%<br>(-0.8% - 1.7%) | 0.44  | 0.81       | 37                | 46 | -1.0%<br>(-9.7% - 8.6%) | 0.83   | 0.10       | 36            | 43 | -0.3%<br>(-10.1% - 10.6%) | 0.95   | 0.30       |
| <i>LTA</i>                              | AA       | 266                    | 220 | 1.0%<br>(-0.1% - 2.1%) | 0.072 |            | 43                | 40 | 7.5%<br>(-1.3% - 17.2%) | 0.097  |            | 41            | 36 | 23.8%<br>(8.5% - 41.3%)   | 0.0015 |            |
| A252G<br>Rs909253                       | AG GG    | 339                    | 239 | 0.4%<br>(-0.6% - 1.3%) | 0.43  | 0.36       | 50                | 56 | 9.5%<br>(-0.5% - 20.5%) | 0.062  | 0.59       | 49            | 55 | -1.0%<br>(-9.4% - 8.1%)   | 0.82   | 0.012      |

- (a) Increase in NHL risk for each 10% increase in ng/g of PCB180 in carpet dust  
(b) Increase in NHL risk for each 10% increase in pg/g lipid of PCB180 in plasma  
(c) Increase in NHL risk for each 10% increase in pg/g lipid of TEQ in plasma  
(d) Due to small numbers, age adjustment for stratified analysis for plasma measurements was in two groups: <65, ≥65
