# Supplementary material
Source: PubMed Central journal article supplement (PMC2651009)
Supplement: blood-2008-04-153858_3.pdf [file blood-2008-04-153858_3.pdf]

| Gene<br>Alias/polymorphism<br>rs number | Genotype | PCB 180 in Carpet Dust |     |                           |       |            | PCB 180 in Plasma |    |                         |        |                  | TEQ in Plasma |    |                           |        |                  |
|-----------------------------------------|----------|------------------------|-----|---------------------------|-------|------------|-------------------|----|-------------------------|--------|------------------|---------------|----|---------------------------|--------|------------------|
|                                         |          | Ca                     | Co  | NHL Risk (a)              | p     | P<br>inter | Ca                | Co | NHL Risk (b)            | P      | P<br>interaction | Ca            | Co | NHL Risk (c)              | P      | p<br>interaction |
| <i>CCR5</i>                             | ++       | 473                    | 365 | 0.6%<br>(-0.1% - 1.4%)    | 0.11  |            | 83                | 78 | 7.4%<br>(0.4% - 14.9%)  | 0.038  |                  | 80            | 73 | 7.7%<br>(0.1% - 16.0%)    | 0.048  |                  |
| $\Delta 32$<br>rs333                    | + -      | 109                    | 81  | 0.9%<br>(-0.8% - 2.6%)    | 0.32  | 0.96       | 9                 | 18 | 410%                    | 0.58   | 0.39             | 9             | 18 | -60.5%                    | 0.14   | 0.47             |
| <i>CTLA4</i>                            | AA       | 222                    | 174 | 1.2%<br>(-0.0003% - 2.5%) | 0.056 |            | 39                | 39 | 6.3%<br>(-3.7% - 17.4%) | 0.22   |                  | 38            | 37 | 12.2%<br>(-0.7% - 26.7%)  | 0.064  |                  |
| T17A<br>rs231775                        | AG GG    | 341                    | 252 | 0.4%<br>(-0.5% - 1.4%)    | 0.33  | 0.42       | 50                | 55 | 14.3%<br>(4.1% - 25.5%) | 0.0049 | 0.067            | 48            | 52 | 7.7%<br>(-1.1% - 17.3%)   | 0.090  | 0.55             |
| <i>CX3CR1</i>                           | GG       | 235                    | 170 | 1.0%<br>(-0.2% - 2.2%)    | 0.10  |            | 46                | 49 | 4.9%<br>(-4.8% - 15.6%) | 0.33   |                  | 45            | 47 | 6%<br>(-2.8% - 16.7%)     | 0.18   |                  |
| V249I<br>rs3732379                      | AG AA    | 175                    | 150 | 1.3%<br>(-0.1% - 2.6%)    | 0.061 | 0.77       | 43                | 41 | 10.4%<br>(1.0% - 20.7%) | 0.030  | 0.72             | 41            | 38 | 11.9%<br>(-0.04% - 25.3%) | 0.051  | 0.67             |
| <i>CXCL12</i>                           | GG       | 392                    | 293 | 0.9%<br>(0.04% - 1.8%)    | 0.040 |            | 60                | 64 | 4.9%<br>(-2.6% - 13.0%) | 0.21   |                  | 57            | 60 | 6.2%<br>(-1.5% - 14.4%)   | 0.12   |                  |
| 3'UTR Ex4+535C>T<br>rs1801157           | AG AA    | 194                    | 154 | 0.4%<br>(-0.8% - 1.7%)    | 0.51  | 0.44       | 31                | 29 | 24.1%<br>(6.1% - 45.3%) | 0.0071 | 0.24             | 31            | 28 | 27.5%<br>(6.0% - 53.3%)   | 0.0099 | 0.35             |
| <i>FCGR2A</i>                           | GG       | 115                    | 116 | -0.4%<br>(-1.9% - 1.2%)   | 0.65  |            | 22                | 20 | 19.7%<br>(0.8% - 42.1%) | 0.040  |                  | 22            | 19 | 14.1%<br>(-2.0% - 33.0%)  | 0.090  |                  |
| H165R<br>rs1801274                      | AG AA    | 473                    | 331 | 0.8%<br>(-0.03% - 1.6%)   | 0.059 | 0.33       | 71                | 75 | 6.7%<br>(-0.6% - 14.6%) | 0.073  | 0.60             | 68            | 71 | 7.9%<br>(-0.4% - 16.9%)   | 0.064  | 0.65             |
| <i>ICAM</i> (d)                         | AA       | 569                    | 429 | 0.7%<br>(-0.1% - 1.4%)    | 0.071 |            | 92                | 95 |                         |        |                  | 89            | 90 |                           |        |                  |
| K56M<br>rs5491                          | AT TT    | 17                     | 23  | -1.7%<br>(-8.3% - 5.4%)   | 0.63  | 0.32       | 1                 | 0  |                         |        |                  | 1             | 0  |                           |        |                  |

| Gene<br>Alias/polymorphism<br>rs number | Genotype | PCB 180 in Carpet Dust |     |                        |       |            | PCB 180 in Plasma |    |                          |        |                  | TEQ in Plasma |    |                          |       |                  |
|-----------------------------------------|----------|------------------------|-----|------------------------|-------|------------|-------------------|----|--------------------------|--------|------------------|---------------|----|--------------------------|-------|------------------|
|                                         |          | Ca                     | Co  | NHL Risk (a)           | p     | P<br>inter | Ca                | Co | NHL Risk (b)             | P      | P<br>interaction | Ca            | Co | NHL Risk (c)             | P     | p<br>interaction |
| <i>IFNGR2</i><br>Q64R<br>rs9808753      | AA       | 426                    | 321 | 0.8%<br>(-0.1% - 1.6%) | 0.075 |            | 70                | 67 | 9.7%<br>(1.8% - 18.2%)   | 0.015  |                  | 69            | 66 | 11.5%<br>(2.2% - 21.6%)  | 0.014 |                  |
|                                         | AG GG    | 165                    | 134 | 0.5%<br>(-0.9% - 1.9%) | 0.48  | 0.50       | 23                | 29 | 17.1%<br>(-0.3% - 37.5%) | 0.055  | 0.21             | 21            | 25 | 12.2%<br>(-3.6% - 30.5%) | 0.14  | 0.89             |
| <i>IL1A</i><br>A114S<br>rs17561         | GG       | 297                    | 228 | 0.6%<br>(-0.4% - 1.7%) | 0.23  |            | 43                | 44 | 8.0%<br>(-1.5% - 18.5%)  | 0.10   |                  | 41            | 41 | 8.5%<br>(-2.9% - 21.2%)  | 0.15  |                  |
|                                         | GT TT    | 297                    | 223 | 0.6%<br>(-0.3% - 1.6%) | 0.21  | 0.77       | 48                | 51 | 4.4%<br>(-5.1% - 14.8%)  | 0.38   | 0.87             | 47            | 49 | 7.2%<br>(-2.3% - 17.6%)  | 0.14  | 0.62             |
| <i>IL1A</i><br>C-889T<br>rs1800587      | CC       | 286                    | 220 | 0.8%<br>(-0.2% - 1.9%) | 0.12  |            | 43                | 43 | 7.5%<br>(-2.1% - 17.9%)  | 0.13   |                  | 41            | 40 | 7.2%<br>(-4.3% - 20.0%)  | 0.23  |                  |
|                                         | CT TT    | 316                    | 236 | 0.6%<br>(-0.4% - 1.5%) | 0.24  | 0.87       | 50                | 50 | 5.8%<br>(-3.7% - 16.3%)  | 0.24   | 0.83             | 49            | 48 | 8.0%<br>(-1.6% - 18.6%)  | 0.10  | 0.92             |
| <i>IL1B</i><br>C-511T<br>rs16944        | CC       | 261                    | 191 | 1.4%<br>(0.3% - 2.5%)  | 0.015 |            | 36                | 36 | 7.5%<br>(-3.9% - 20.4%)  | 0.21   |                  | 35            | 35 | 7.9%<br>(-4.7% - 22.1%)  | 0.23  |                  |
|                                         | CT TT    | 337                    | 264 | 0.2%<br>(-0.7% - 1.2%) | 0.67  | 0.13       | 56                | 60 | 11.6%<br>(2.8% - 21.1%)  | 0.0086 | 0.34             | 54            | 56 | 10.8%<br>(1.5% - 20.9%)  | 0.022 | 0.81             |
| <i>IL1B</i><br>C3954T<br>rs1143634      | CC       | 354                    | 285 | 0.9%<br>(-0.1% - 1.8%) | 0.067 |            | 53                | 59 | 6.9%<br>(-1.0% - 15.4%)  | 0.090  |                  | 51            | 55 | 7.4%<br>(-2.2% - 18.0%)  | 0.13  |                  |
|                                         | CT TT    | 245                    | 170 | 0.4%<br>(-0.7% - 1.5%) | 0.47  | 0.38       | 40                | 37 | 10.5%<br>(-1.2% - 23.5%) | 0.080  | 0.53             | 39            | 36 | 10.9%<br>(0.1% - 22.9%)  | 0.048 | 0.56             |
| <i>IL1B</i><br>T-31C<br>rs1143627       | TT       | 260                    | 185 | 1.3%<br>(0.2% - 2.4%)  | 0.020 |            | 36                | 35 | 9.7%<br>(-2.5% - 23.5%)  | 0.12   |                  | 36            | 34 | 9.5%<br>(-3.4% - 24.2%)  | 0.16  |                  |
|                                         | CT CC    | 335                    | 272 | 0.1%<br>(-0.8% - 1.1%) | 0.83  | 0.12       | 57                | 61 | 9.8%<br>(1.6% - 18.7%)   | 0.018  | 0.63             | 54            | 57 | 8.8%<br>(0.05% - 18.3%)  | 0.049 | 0.89             |
| <i>IL1RN</i><br>A9589T<br>rs454078      | AA       | 351                    | 256 | 0.8%<br>(-0.1% - 1.7%) | 0.098 |            | 42                | 54 | 8.3%<br>(-0.6% - 17.9%)  | 0.067  |                  | 41            | 52 | 9.4%<br>(-1.0% - 20.9%)  | 0.077 |                  |
|                                         | AT TT    | 241                    | 204 | 0.4%<br>(-0.7% - 1.5%) | 0.49  | 0.40       | 49                | 42 | 11.2%<br>(0.0% - 23.7%)  | 0.050  | 0.71             | 47            | 39 | 4.9%<br>(-4.9% - 15.8%)  | 0.34  | 0.36             |

| Gene<br>Alias/polymorphism<br>rs number      | Genotype | PCB 180 in Carpet Dust |     |                          |        |            | PCB 180 in Plasma |    |                          |        |                  | TEQ in Plasma |    |                         |       |                  |
|----------------------------------------------|----------|------------------------|-----|--------------------------|--------|------------|-------------------|----|--------------------------|--------|------------------|---------------|----|-------------------------|-------|------------------|
|                                              |          | Ca                     | Co  | NHL Risk (a)             | p      | P<br>inter | Ca                | Co | NHL Risk (b)             | P      | P<br>interaction | Ca            | Co | NHL Risk (c)            | P     | p<br>interaction |
| <i>IL2</i><br>Ex2T>G<br>rs2069762            | TT       | 312                    | 234 | 0.7%<br>(-0.3% - 1.6%)   | 0.19   |            | 55                | 49 | 8.5%<br>(-0.6% - 18.4%)  | 0.068  |                  | 53            | 46 | 5.1%<br>(-4.7% - 16.0%) | 0.32  |                  |
|                                              | GT GG    | 281                    | 220 | 0.6%<br>(-0.4% - 1.7%)   | 0.24   | 0.76       | 38                | 44 | 5.8%<br>(-3.9% - 16.6%)  | 0.25   | 0.49             | 37            | 42 | 9.5%<br>(-1.3% - 21.5%) | 0.087 | 0.89             |
| <i>IL4</i><br>T-1098G<br>rs2243248           | TT       | 511                    | 389 | 0.5%<br>(-0.2% - 1.3%)   | 0.18   |            | 82                | 89 | 8.2%<br>(1.2% - 15.6%)   | 0.022  |                  | 79            | 85 | 9.0%<br>(1.6% - 16.9%)  | 0.017 |                  |
|                                              | GT GG    | 89                     | 67  | 1.6%<br>(-0.5% - 3.8%)   | 0.14   | 0.41       | 11                | 7  | 4.7%<br>(-16.9% - 31.8%) | 0.70   | 0.73             | 11            | 6  | -58.4%                  | 0.31  | 0.44             |
| <i>IL4R</i><br>C-29429T<br>rs2107356         | CC       | 225                    | 163 | 0.2%<br>(-1.0% - 1.4%)   | 0.77   |            | 36                | 39 | 2.7%<br>(-6.4% - 12.8%)  | 0.57   |                  | 35            | 36 | 2.9%<br>(-7.8% - 14.8%) | 0.61  |                  |
|                                              | CT TT    | 362                    | 287 | 0.8%<br>(-0.1% - 1.7%)   | 0.069  | 0.39       | 57                | 55 | 13.7%<br>(2.9% - 25.6%)  | 0.012  | 0.71             | 55            | 53 | 14.3%<br>(3.1% - 26.7%) | 0.011 | 0.15             |
| <i>IL5</i><br>C-745T<br>rs2069812            | CC       | 269                    | 184 | 0.5%<br>(-0.5% - 1.6%)   | 0.33   |            | 42                | 43 | 19.0%<br>(5.8% - 33.9%)  | 0.0037 |                  | 42            | 42 | 15.7%<br>(2.0% - 31.1%) | 0.023 |                  |
|                                              | CT TT    | 318                    | 269 | 0.6%<br>(-0.3% - 1.6%)   | 0.19   | 0.85       | 51                | 53 | 3.3%<br>(-4.4% - 11.7%)  | 0.41   | 0.17             | 48            | 49 | 4.6%<br>(-3.7% - 13.7%) | 0.28  | 0.21             |
| <i>IL5</i> (d)<br>C-1551T<br>rs2069807       | CC       | 570                    | 435 | 0.6%<br>(-0.1% - 1.3%)   | 0.093  |            | 91                | 93 |                          |        |                  | 88            | 88 |                         |       |                  |
|                                              | CT TT    | 10                     | 14  | -4.7%<br>(-11.8% - 2.9%) | 0.22   | 0.92       | 1                 | 3  |                          |        |                  | 1             | 3  |                         |       |                  |
| <i>IL5</i> (d) (e)<br>Ex4+78C>A<br>rs2069818 | CC       | 397                    | 311 |                          |        |            | 88                | 90 |                          |        |                  | 85            | 85 |                         |       |                  |
|                                              | AC AA    | 4                      | 2   |                          |        |            | 1                 | 2  |                          |        |                  | 1             | 2  |                         |       |                  |
| <i>IL6</i><br>G-174C<br>rs1800795            | GG       | 231                    | 180 | 1.5%<br>(0.4% - 2.7%)    | 0.0097 |            | 33                | 36 | 2.8%<br>(-7.8% - 14.6%)  | 0.62   |                  | 32            | 35 | 3.1%<br>(-8.2% - 15.8%) | 0.60  |                  |
|                                              | CG CC    | 367                    | 274 | 0.1%<br>(-0.8% - 1.0%)   | 0.77   | 0.047      | 57                | 59 | 11.7%<br>(2.5% - 21.7%)  | 0.011  | 0.13             | 55            | 55 | 10.6%<br>(1.1% - 21.0%) | 0.029 | 0.16             |

| Gene<br>Alias/polymorphism<br>rs number        | Genotype | PCB 180 in Carpet Dust |     |                         |        |            | PCB 180 in Plasma |    |                          |        |                  | TEQ in Plasma |    |                           |       |                  |
|------------------------------------------------|----------|------------------------|-----|-------------------------|--------|------------|-------------------|----|--------------------------|--------|------------------|---------------|----|---------------------------|-------|------------------|
|                                                |          | Ca                     | Co  | NHL Risk (a)            | p      | P<br>inter | Ca                | Co | NHL Risk (b)             | P      | P<br>interaction | Ca            | Co | NHL Risk (c)              | P     | p<br>interaction |
| <i>IL6</i><br>G-597A or G-598A<br>rs1800797    | GG       | 233                    | 175 | 1.5%<br>(0.3% - 2.6%)   | 0.014  |            | 33                | 38 | 2.4%<br>(-8.1% - 14.1%)  | 0.66   |                  | 32            | 37 | 3.0%<br>(-8.3% - 15.7%)   | 0.62  |                  |
|                                                | AG AA    | 356                    | 272 | 0.2%<br>(-0.7% - 1.1%)  | 0.69   | 0.069      | 59                | 57 | 13.3%<br>(3.8% - 23.7%)  | 0.0053 | 0.14             | 57            | 53 | 11.1%<br>(1.6% - 21.6%)   | 0.021 | 0.22             |
| <i>IL7R</i><br>V138I<br>rs1494555              | AA       | 189                    | 157 | 0.5%<br>(-0.7% - 1.8%)  | 0.40   |            | 46                | 46 | 12.1%<br>(1.9% - 23.3%)  | 0.019  |                  | 44            | 41 | 10.2%<br>(-0.8% - 22.6%)  | 0.071 |                  |
|                                                | AG GG    | 229                    | 175 | 1.3%<br>(0.1% - 2.4%)   | 0.033  | 0.54       | 47                | 50 | 3.9%<br>(-5.9% - 14.6%)  | 0.45   | 0.083            | 46            | 50 | 8.2%<br>(-2.3% - 19.9%)   | 0.13  | 0.58             |
| <i>IL8</i><br>IVS1-204C>T<br>rs2227306         | CC       | 221                    | 173 | 0.5%<br>(-0.7% - 1.7%)  | 0.42   |            | 33                | 43 | 20.7%<br>(4.9% - 38.8%)  | 0.0084 |                  | 33            | 41 | 3.8%<br>(-6.7% - 15.5%)   | 0.49  |                  |
|                                                | CT TT    | 351                    | 264 | 0.8%<br>(-0.2% - 1.7%)  | 0.10   | 0.80       | 59                | 53 | 6.1%<br>(-1.5% - 14.4%)  | 0.12   | 0.10             | 57            | 50 | 12.2%<br>(2.5% - 22.9%)   | 0.013 | 0.37             |
| <i>IL8RB</i><br>3'UTR,Ex3+1235T>C<br>rs1126579 | CC       | 168                    | 161 | -0.2%<br>(-1.4% - 1.1%) | 0.77   |            | 24                | 33 | 14.5%<br>(-1.5% - 33.0%) | 0.078  |                  | 23            | 31 | -1.1%<br>(-12.6% - 12.0%) | 0.86  |                  |
|                                                | CT TT    | 400                    | 277 | 1.1%<br>(0.2% - 2.1%)   | 0.017  | 0.071      | 64                | 61 | 6.1%<br>(-1.1% - 13.8%)  | 0.10   | 0.30             | 62            | 58 | 10.9%<br>(1.5% - 21.2%)   | 0.022 | 0.13             |
| <i>IL8RB</i><br>L262L<br>rs2230054             | TT       | 96                     | 87  | 0.3%<br>(-1.4% - 2.1%)  | 0.70   |            | 20                | 25 | 25.5%<br>(-0.8% - 58.7%) | 0.059  |                  | 20            | 23 | 8.7%<br>(-6.6% - 26.5%)   | 0.28  |                  |
|                                                | CT CC    | 321                    | 243 | 1.3%<br>(0.3% - 2.4%)   | 0.0092 | 0.25       | 73                | 71 | 6.8%<br>(-0.2% - 14.3%)  | 0.057  | 0.28             | 70            | 68 | 6.8%<br>(-1.2% - 15.4%)   | 0.097 | 0.64             |
| <i>IL8RB</i><br>3'UTR,Ex3-1010G>A<br>rs1126580 | AA       | 190                    | 155 | 1.1%<br>(-0.1% - 2.4%)  | 0.069  |            | 31                | 37 | 16.7%<br>(1.6% - 34.0%)  | 0.029  |                  | 30            | 34 | 6.9%<br>(-5.4% - 20.6%)   | 0.28  |                  |
|                                                | AG GG    | 380                    | 289 | 0.3%<br>(-0.6% - 1.3%)  | 0.46   | 0.27       | 62                | 56 | 5.9%<br>(-1.6% - 14.1%)  | 0.13   | 0.12             | 60            | 54 | 9.0%<br>(-0.1% - 18.9%)   | 0.052 | 0.77             |
| <i>IL10</i><br>C-819T                          | CC       | 309                    | 244 | 0.5%<br>(-0.5% - 1.4%)  | 0.37   |            | 49                | 52 | 9.3%<br>(-0.5% - 20.1%)  | 0.064  |                  | 48            | 49 | 5.8%<br>(-3.2% - 15.6%)   | 0.22  |                  |
|                                                | CT TT    | 284                    | 210 | 0.9%                    | 0.10   | 0.52       | 44                | 43 | 8.8%                     | 0.067  | 0.30             | 42            | 41 | 13.4%                     | 0.041 | 0.75             |

| Gene<br>Alias/polymorphism<br>rs number | Genotype | PCB 180 in Carpet Dust |     |                         |       |            | PCB 180 in Plasma |    |                          |       |                  | TEQ in Plasma |    |                          |       |                  |
|-----------------------------------------|----------|------------------------|-----|-------------------------|-------|------------|-------------------|----|--------------------------|-------|------------------|---------------|----|--------------------------|-------|------------------|
|                                         |          | Ca                     | Co  | NHL Risk (a)            | p     | P<br>inter | Ca                | Co | NHL Risk (b)             | P     | P<br>interaction | Ca            | Co | NHL Risk (c)             | P     | p<br>interaction |
| rs1800871                               |          |                        |     | (-0.2% - 1.9%)          |       |            |                   |    | (-0.6% - 19.2%)          |       |                  |               |    | (0.5% - 27.8%)           |       |                  |
| <i>IL10</i>                             | CC       | 306                    | 243 | 0.4%<br>(-0.6% - 1.4%)  | 0.46  |            | 48                | 53 | 9.4%<br>(-0.5% - 20.2%)  | 0.062 |                  | 47            | 50 | 5.7%<br>(-3.3% - 15.5%)  | 0.22  |                  |
| C-592A<br>rs1800872                     | AC AA    | 283                    | 211 | 0.9%<br>(-0.2% - 1.9%)  | 0.10  | 0.46       | 42                | 41 | 7.6%<br>(-1.8% - 17.8%)  | 0.12  | 0.26             | 40            | 39 | 11.6%<br>(-1.2% - 26.1%) | 0.077 | 0.88             |
| <i>IL10</i>                             | TT       | 224                    | 192 | 0.5%<br>(-0.7% - 1.6%)  | 0.42  |            | 40                | 36 | 5.6%<br>(-3.9% - 16.0%)  | 0.26  |                  | 38            | 33 | 8.4%<br>(-3.3% - 21.5%)  | 0.17  |                  |
| T-3575A<br>rs1800890                    | AT AA    | 373                    | 262 | 0.9%<br>(-0.01% - 1.9%) | 0.052 | 0.33       | 51                | 60 | 12.5%<br>(1.8% - 24.3%)  | 0.021 | 0.21             | 50            | 58 | 9.7%<br>(-0.3% - 20.7%)  | 0.059 | 0.81             |
| <i>IL10RA</i>                           | GG       | 163                    | 119 | 0.6%<br>(-0.8% - 2.0%)  | 0.42  |            | 34                | 30 | 9.0%<br>(-2.9% - 22.3%)  | 0.14  |                  | 31            | 29 | 21.1%<br>(4.3% - 40.7%)  | 0.012 |                  |
| 3'UTR,Ex7-109G>A<br>rs9610              | AG AA    | 428                    | 329 | 0.5%<br>(-0.3% - 1.4%)  | 0.22  | 0.85       | 58                | 65 | 8.2%<br>(-0.4% - 17.6%)  | 0.063 | 0.72             | 58            | 61 | 5.7%<br>(-3.3% - 15.4%)  | 0.22  | 0.17             |
| <i>IL12B</i>                            | AA       | 351                    | 276 | 0.5%<br>(-0.4% - 1.4%)  | 0.27  |            | 47                | 58 | 10.0%<br>(-0.5% - 21.7%) | 0.064 |                  | 46            | 55 | 11.3%<br>(0.5% - 23.3%)  | 0.040 |                  |
| 3'UTR,Ex8+159A>C<br>rs3212227           | AC CC    | 235                    | 172 | 0.7%<br>(-0.5% - 1.9%)  | 0.25  | 0.80       | 44                | 35 | 5.1%<br>(-3.6% - 14.6%)  | 0.26  | 0.21             | 42            | 33 | 0.9%<br>(-8.6% - 11.3%)  | 0.87  | 0.40             |
| <i>IL13</i>                             | CC       | 348                    | 285 | 0.5%<br>(-0.4% - 1.4%)  | 0.25  |            | 52                | 60 | 7.4%<br>(-0.2% - 15.7%)  | 0.056 |                  | 50            | 58 | 4.8%<br>(-3.5% - 13.7%)  | 0.27  |                  |
| C-1069T<br>rs1800925                    | CT TT    | 249                    | 170 | 1.0%<br>(-0.2% - 2.2%)  | 0.096 | 0.54       | 41                | 36 | 8.6%<br>(-4.1% - 23.1%)  | 0.19  | 0.74             | 40            | 33 | 17.1%<br>(2.8% - 33.4%)  | 0.018 | 0.42             |
| <i>IL15</i>                             | CC       | 261                    | 170 | 0.7%<br>(-0.4% - 1.8%)  | 0.24  |            | 40                | 39 | 4.8%<br>(-4.8% - 15.5%)  | 0.34  |                  | 37            | 35 | 6.7%<br>(-4.3% - 18.9%)  | 0.24  |                  |
| 3'UTR,Ex9-66T>C<br>rs10833              | CT TT    | 316                    | 267 | 0.7%<br>(-0.2% - 1.7%)  | 0.14  | 0.79       | 53                | 57 | 10.3%<br>(0.6% - 20.9%)  | 0.037 | 0.37             | 53            | 56 | 8.3%<br>(-1.1% - 18.6%)  | 0.085 | 0.42             |
| <i>IL15RA</i>                           | GG       | 166                    | 123 | 0.2%<br>(-1.2% - 1.7%)  | 0.74  |            | 27                | 36 | 9.2%<br>(-4.9% - 25.4%)  | 0.21  |                  | 26            | 34 | 8.5%<br>(-5.5% - 24.7%)  | 0.25  |                  |

| Gene<br>Alias/polymorphism<br>rs number | Genotype | PCB 180 in Carpet Dust |     |                         |       |            | PCB 180 in Plasma |    |                          |       |                  | TEQ in Plasma |    |                           |       |                  |
|-----------------------------------------|----------|------------------------|-----|-------------------------|-------|------------|-------------------|----|--------------------------|-------|------------------|---------------|----|---------------------------|-------|------------------|
|                                         |          | Ca                     | Co  | NHL Risk (a)            | p     | P<br>inter | Ca                | Co | NHL Risk (b)             | P     | P<br>interaction | Ca            | Co | NHL Risk (c)              | P     | p<br>interaction |
| 3'UTR,Ex8-361A>C<br>rs2296135           | GT TT    | 409                    | 310 | 0.8%<br>(-0.04% - 1.7%) | 0.061 | 0.59       | 65                | 60 | 6.4%<br>(-1.1% - 14.5%)  | 0.094 | 0.18             | 63            | 57 | 10.9%<br>(1.5% - 21.2%)   | 0.022 | 0.68             |
| <i>JAK3</i>                             | CC       | 100                    | 91  | 1.7%<br>(-0.1% - 3.6%)  | 0.065 |            | 23                | 30 | 25.2%<br>(5.1% - 49.1%)  | 0.012 |                  | 22            | 27 | 31.1%<br>(4.7% - 64.2%)   | 0.018 |                  |
| 3'UTR,Ex23+291A>G<br>rs3008             | CT TT    | 321                    | 240 | 0.7%<br>(-0.3% - 1.7%)  | 0.17  | 0.37       | 70                | 66 | 6.2%<br>(-1.4% - 14.4%)  | 0.11  | 0.14             | 68            | 64 | 6.6%<br>(-1.4% - 15.1%)   | 0.11  | 0.13             |
| <i>LTA</i>                              | CC       | 217                    | 156 | 0.2%<br>(-0.9% - 1.4%)  | 0.71  |            | 33                | 27 | 3.5%<br>(-10.0% - 19.0%) | 0.63  |                  | 32            | 24 | -3.8%<br>(-16.1% - 10.4%) | 0.58  |                  |
| C-91A<br>rs2239704                      | AC AA    | 320                    | 258 | 0.7%<br>(-0.3% - 1.6%)  | 0.17  | 0.64       | 42                | 55 | 4.7%<br>(-3.4% - 13.5%)  | 0.26  | 0.95             | 40            | 53 | 12.6%<br>(1.5% - 25.1%)   | 0.026 | 0.24             |
| <i>SELE</i>                             | AA       | 324                    | 258 | 0.5%<br>(-0.4% - 1.5%)  | 0.29  |            | 72                | 77 | 5.8%<br>(-1.0% - 13.2%)  | 0.096 |                  | 70            | 72 | 7.9%<br>(0.1% - 16.4%)    | 0.048 |                  |
| S149R<br>Rs5361                         | AC CC    | 84                     | 60  | 2.9%<br>(0.7% - 5.1%)   | 0.010 | 0.14       | 19                | 17 | 18.7%<br>(-3.4% - 46.0%) | 0.10  | 0.17             | 18            | 17 | 10.3%<br>(-7.3% - 31.3%)  | 0.27  | 0.75             |
| <i>STAT1</i>                            | CC       | 222                    | 189 | 0.9%<br>(-0.3% - 2.1%)  | 0.13  |            | 48                | 62 | 8.5%<br>(-0.1% - 17.9%)  | 0.053 |                  | 47            | 61 | 6.0%<br>(-2.8% - 15.6%)   | 0.19  |                  |
| IVS21-8C>T<br>rs2066804                 | CT TT    | 187                    | 130 | 1.2%<br>(-0.2% - 2.6%)  | 0.085 | 0.98       | 45                | 32 | 8.4%<br>(-2.8% - 20.8%)  | 0.15  | 0.74             | 43            | 28 | 12.0%<br>(-1.4% - 27.3%)  | 0.082 | 0.51             |
| <i>TLR4</i> (d)                         | AA       | 521                    | 405 | 0.7%<br>(-0.1% - 1.4%)  | 0.078 |            | 89                | 85 |                          |       |                  | 86            | 82 |                           |       |                  |
| D299G<br>rs4986790                      | AG GG    | 63                     | 45  | -0.5%<br>(-2.9% - 1.8%) | 0.66  | 0.47       | 4                 | 11 |                          |       |                  | 4             | 9  |                           |       |                  |
| <i>TNF</i>                              | GG       | 436                    | 345 | 0.9%<br>(0.05% - 1.7%)  | 0.039 |            | 62                | 68 | 7.5%<br>(-0.2% - 15.8%)  | 0.056 |                  | 60            | 63 | 8.8%<br>(0.5% - 17.8%)    | 0.036 |                  |
| G-308A<br>rs1800629                     | AG AA    | 165                    | 113 | -0.1%<br>(-1.5% - 1.3%) | 0.90  | 0.32       | 31                | 28 | 9.2%<br>(-4.7% - 25.3%)  | 0.21  | 0.57             | 30            | 28 | 6.6%<br>(-9.3% - 25.3%)   | 0.44  | 0.87             |
| <i>TNF</i>                              | GG       | 526                    | 392 | 0.5%                    | 0.18  |            | 79                | 88 | 8.8%                     | 0.015 |                  | 76            | 83 | 8.9%                      | 0.027 |                  |

| Gene<br>Alias/polymorphism<br>rs number | Genotype  | PCB 180 in Carpet Dust |     |                                          |       |            | PCB 180 in Plasma |    |                                            |       |                  | TEQ in Plasma |    |                                             |       |                  |
|-----------------------------------------|-----------|------------------------|-----|------------------------------------------|-------|------------|-------------------|----|--------------------------------------------|-------|------------------|---------------|----|---------------------------------------------|-------|------------------|
|                                         |           | Ca                     | Co  | NHL Risk (a)                             | p     | P<br>inter | Ca                | Co | NHL Risk (b)                               | P     | P<br>interaction | Ca            | Co | NHL Risk (c)                                | P     | p<br>interaction |
| G-238A<br>rs361525                      | AG AA     | 58                     | 57  | (-0.2% - 1.3%)<br>1.6%<br>(-0.8% - 4.1%) | 0.19  | 0.30       | 14                | 8  | (1.7% - 16.5%)<br>0.5%<br>(-25.6% - 35.7%) | 0.97  | 0.80             | 14            | 8  | (1.0% - 17.4%)<br>-9.0%<br>(-38.6% - 36.1%) | 0.65  | 0.75             |
|                                         | TNF       | 489                    | 364 | 0.7%<br>(-0.1% - 1.5%)                   | 0.095 |            | 80                | 81 | 8.7%<br>(1.6% - 16.3%)                     | 0.015 |                  | 77            | 76 | 7.8%<br>(0.4% - 15.7%)                      | 0.037 |                  |
| C-857T<br>rs1799724                     | CT TT     | 98                     | 89  | 0.1%<br>(-1.6% - 1.8%)                   | 0.93  | 0.39       | 12                | 15 | -89.7%                                     | 0.32  | 0.62             | 12            | 15 | -10.1%<br>(-40.9% - 36.7%)                  | 0.62  | 0.83             |
|                                         | TNF       | 381                    | 304 | 0.3%<br>(-0.5% - 1.2%)                   | 0.43  |            | 52                | 62 | 8.2%<br>(-0.01% - 17.1%)                   | 0.050 |                  | 51            | 61 | 11.6%<br>(1.5% - 22.6%)                     | 0.023 |                  |
| A-863C<br>rs1800630                     | AC AA     | 173                    | 115 | 0.9%<br>(-0.5% - 2.4%)                   | 0.21  | 0.23       | 38                | 29 | 11.6%<br>(-1.6% - 26.5%)                   | 0.086 | 0.93             | 36            | 25 | 5.9%<br>(-6.8% - 20.4%)                     | 0.38  | 0.62             |
|                                         | VCAM1     | 398                    | 309 | 0.4%<br>(-0.4% - 1.3%)                   | 0.35  |            | 66                | 66 | 5.8%<br>(-1.6% - 13.8%)                    | 0.13  |                  | 64            | 62 | 5.6%<br>(-2.4% - 14.3%)                     | 0.17  |                  |
| T-1519C<br>rs1041163                    | CT CC     | 173                    | 138 | 0.9%<br>(-0.4% - 2.2%)                   | 0.16  | 0.34       | 27                | 27 | 13.8%<br>(-1.6% - 31.6%)                   | 0.081 | 0.29             | 26            | 26 | 13.8%<br>(-4.0% - 34.7%)                    | 0.14  | 0.19             |
|                                         | VCAM1 (d) | 532                    | 399 | 0.6%<br>(-0.1% - 1.4%)                   | 0.11  |            | 87                | 85 |                                            |       |                  | 84            | 80 |                                             |       |                  |
| K644K<br>rs3176879                      | AG GG     | 52                     | 51  | 0.4%<br>(-2.1% - 3.0%)                   | 0.75  | 0.97       | 6                 | 10 |                                            |       |                  | 6             | 10 |                                             |       |                  |

- (a) Increase in NHL risk for each 10% increase in ng/g of PCB180 in carpet dust  
(b) Increase in NHL risk for each 10% increase in pg/g lipid of PCB180 in plasma  
(c) Increase in NHL risk for each 10% increase in pg/g lipid of TEQ in plasma  
(d) Insufficient numbers for stratified analysis for plasma measurements  
(e) Insufficient numbers for stratified analysis for dust measurements
